# Supplementary material
Source: PubMed Central journal article supplement (PMC8766947)
Supplement: NIHMS1765364-supplement-010365_-_Supplemental_Material.pdf [file NIHMS1765364-supplement-010365_-_Supplemental_Material.pdf]

## SUPPLEMENTAL MATERIAL

### Supplemental Methods

***I<sub>Ks</sub> and I<sub>to</sub> heterogeneities in 2D tissue model.*** We simulated two types of heterogeneities in the 2D tissue model in Fig.1. In the first type (Figs. 1 A and B), we used transmural heterogeneities in I<sub>Ks</sub> and I<sub>to</sub> with the maximum conductances G<sub>Ks</sub> and G<sub>to</sub> being the following distributions:

$$G_{Ks}(y) = \begin{cases} 0.5G_{Ks}, & y < L/2 \\ \left[\frac{2}{L}\left(y - \frac{L}{2}\right) + 0.5\right]G_{Ks}, & \frac{L}{2} < y < 3L/4 \\ G_{Ks}, & y > 3L/4 \end{cases} \quad (S1)$$

and

$$G_{to}(y) = \begin{cases} 0, & y < L/2 \\ \frac{4}{L}\left(y - \frac{L}{2}\right)G_{to}, & \frac{L}{2} < y < 3L/4 \\ G_{to}, & y > 3L/4 \end{cases} \quad (S2)$$

where L=256 cells, which is the cable length. G<sub>Ks</sub> in Eq.S1 is control value in original model, i.e., G<sub>Ks</sub>=0.433 mS/cm<sup>2</sup> and G<sub>to</sub> in Eq.S2 is the largest value as marked on each panel in Figs. 1 A and B.

In the second type (Fig.1C), in addition to the transmural heterogeneities in G<sub>Ks</sub> and G<sub>to</sub>, we also added a G<sub>to</sub> heterogeneity in the longitudinal direction by setting G<sub>Ks</sub> and G<sub>to</sub> as follows:

$$G_{Ks}(x, y) = \begin{cases} 0.5G_{Ks}, & y \leq L/2 \\ G_{Ks}, & y > L/2 \end{cases} \quad (S3)$$

and

$$G_{to}(x, y) = \begin{cases} 0, & y \leq L/2 \\ \frac{3x}{L}, & y > L/2 \end{cases} \quad (S4)$$

where L=512 cells.

***Pseudo-ECG.*** The pseudo-ECG was calculated as:

$$ECG = \iint \mathbf{D}\nabla V \cdot \nabla \left(\frac{1}{r}\right) dx dy \quad (S5)$$

where  $r = \sqrt{(x - x_p)^2 + (y - y_p)^2 + z_p^2}$  and  $(x_p, y_p, z_p) = (1.92 \text{ cm}, 0.864 \text{ cm}, 0.15 \text{ cm})$  is the location of the pseudo-ECG electrode.

***Numerical methods.*** An explicit Euler method with a fixed time step  $\Delta t = 0.01 \text{ ms}$  was used for simulations of both the 1D cable (Eq.1) and the 2D tissue (Eq.2). In the 1D cable simulations, we used  $D=0.001 \text{ cm}^2/\text{ms}$  and  $\Delta x=0.015 \text{ cm}$ . For the 2D tissue simulating the endo-epi heterogeneities for ECG morphologies and P2R, we used  $D_x=0.001 \text{ cm}^2/\text{ms}$ ,  $\Delta x=0.015 \text{ cm}$ ,  $D_y=0.001/16 \text{ cm}^2/\text{ms}$ , and  $\Delta y=0.015/4 \text{ cm}$ . For the spiral wave stabilities, we simulated a homogeneous tissue with  $D_x=D_y=0.001 \text{ cm}^2/\text{ms}$  and  $\Delta x=\Delta y=0.015 \text{ cm}$ . The same numerical methods were used for the 1994 Luo and Rudy model and the 2004 ten Tusscher et al human model. All the codes were programed in CUDA C++, and simulations were performed on NVIDIA Tesla K80 GPU cards (NVIDIA, Santa Clara, CA).

## Supplemental Table

**Table I. The female-to-male ratios of the maximum conductance of ionic currents and gap junction conductance.** The values were based on the data from previous studies<sup>30,33</sup>. Except  $I_{to}$ , there were no epi-to-endo heterogeneities in currents in the 1D cable model. In other words, the female-to-male ratios were uniform in the cable, no epi-to-endo heterogeneities except  $I_{to}$ . We did the same simulations as in Fig.8 and Fig.X using the same epi-to-endo heterogeneities in female-to-male ratios as in Yang et al<sup>30</sup>, we only observed small differences from the ones shown in Fig.8 and Fig.X.

|             | $P_{Ca}$ | $G_{Ks}$ | $G_{Kr}$ | $G_{to}$ | $G_{K1}$ | $G_{NaK}$ | D    |
|-------------|----------|----------|----------|----------|----------|-----------|------|
| Female/male | 1.5      | 0.85     | 0.85     | 0.5      | 0.8      | 0.75      | 0.65 |

## Supplemental Figures

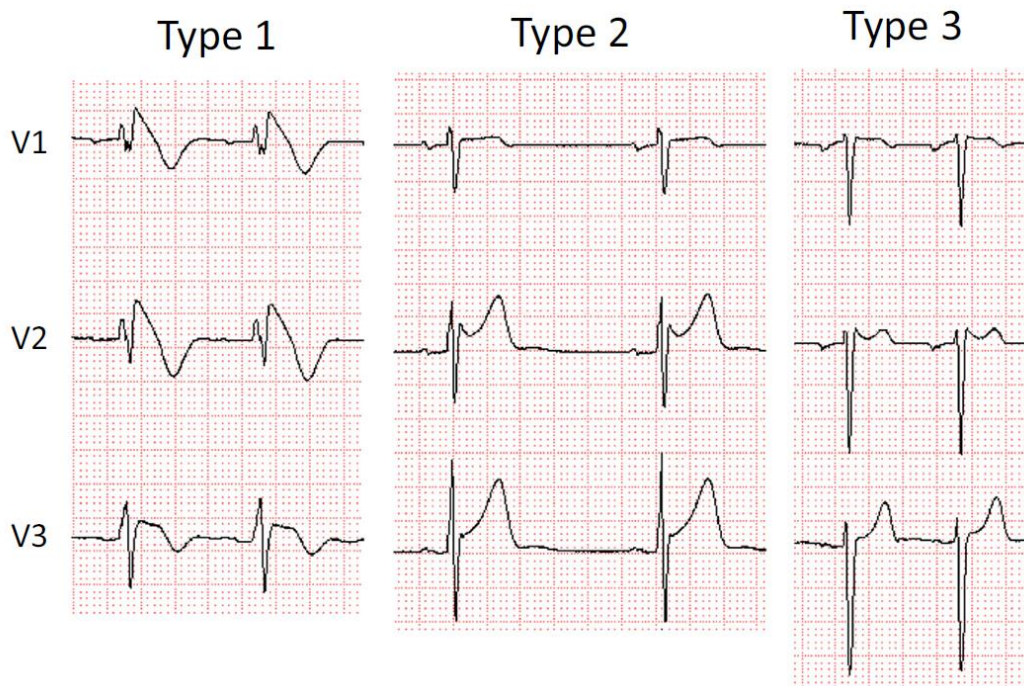

**Figure I. Three types of characteristic ECGs associated with BrS, reproduced from Antzelevitch et al<sup>7</sup> with permission.**

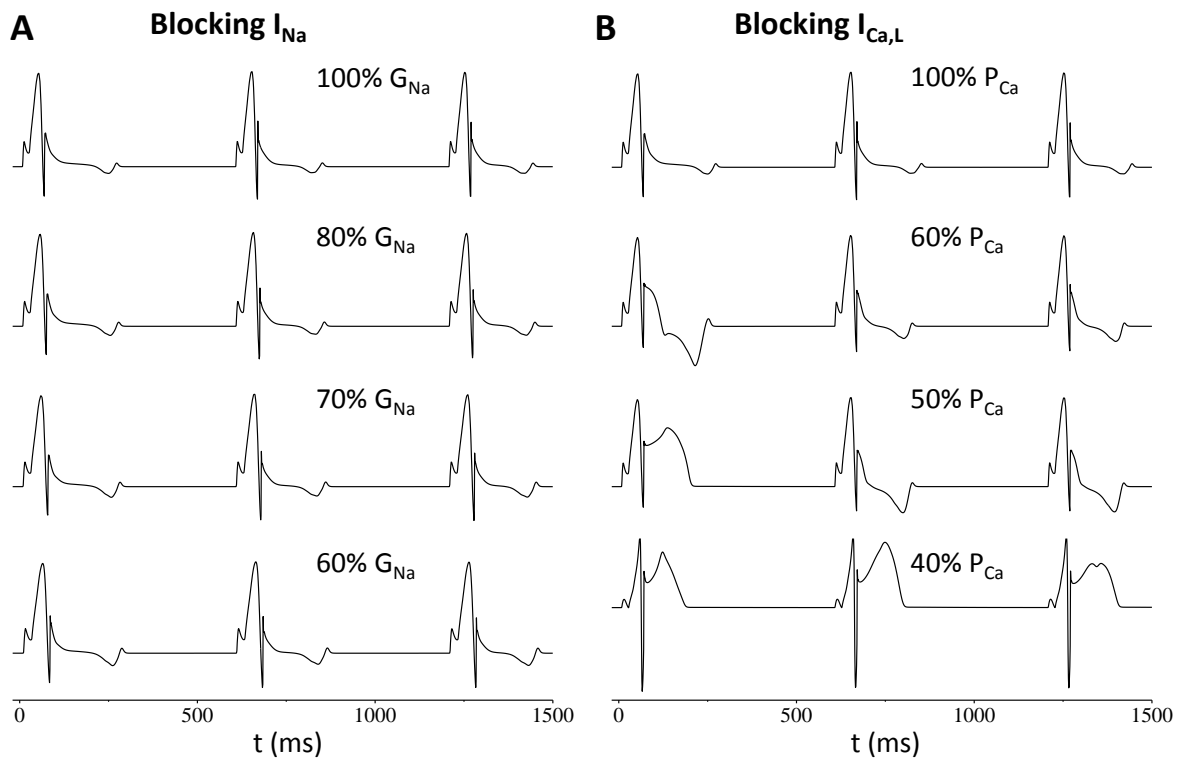

**Figure II. Promotion of type 1 (coved) ECG by blocking  $I_{Na}$  or  $I_{Ca,L}$ .** Simulations were done the same way as for Fig.1A in the main text. **A.** ECGs at different levels of  $I_{Na}$  as marked. **B.** ECGs at different levels of  $I_{Ca,L}$  as marked. All parameters were the same as in Fig.1A with  $G_{to}=1$  mS/cm<sup>2</sup>.

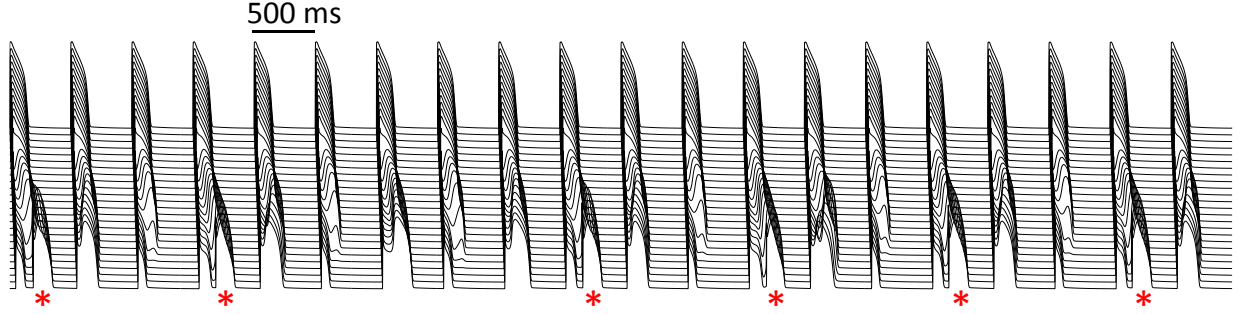

**Figure III.** An example of time-space plot of voltage under periodic pacing with PCL=500 ms from Fig.3A in the main text with  $\gamma=0$  and  $G_{I_{to}}=1.5 \text{ mS/cm}^2$ . “\*” marks the PVCs/P2Rs.

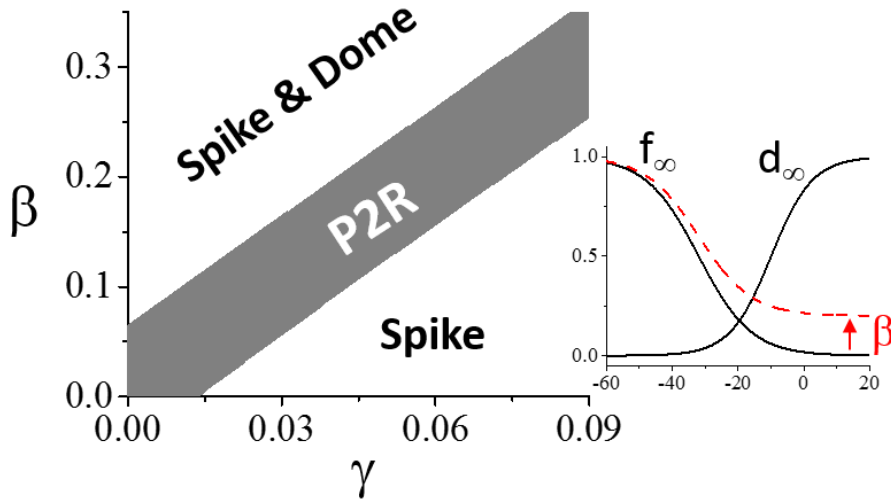

**Figure IV.** Effects of late  $I_{Ca,L}$  on P2R in 1D cable simulations using the Luo and Rudy AP model. The simulations were done under the same condition as for Fig.6 in the main text. Shown is the P2R region versus  $\gamma$  and  $\beta$ .  $\gamma$  is the parameter controlling the late component of  $I_{to}$ .  $\beta$  is the parameter controlling the late component of  $I_{Ca,L}$  by changing the steady-state inactivation ( $f_{\infty}$ ) as:  $f_{\infty, new} = \beta + (1 - \beta)f_{\infty}$  (as indicated in the inset). The effect of increasing late  $I_{to}$  ( $\gamma$ ) on P2R is compensated by increasing the late  $I_{Ca,L}$  ( $\beta$ ), similar to shifting  $f_{\infty}$  as shown in Fig.7E.  $P_{Ca}=0.000594 \text{ cm/s}$  and  $G_{I_{to}}=1.75 \text{ mS/cm}^2$ .

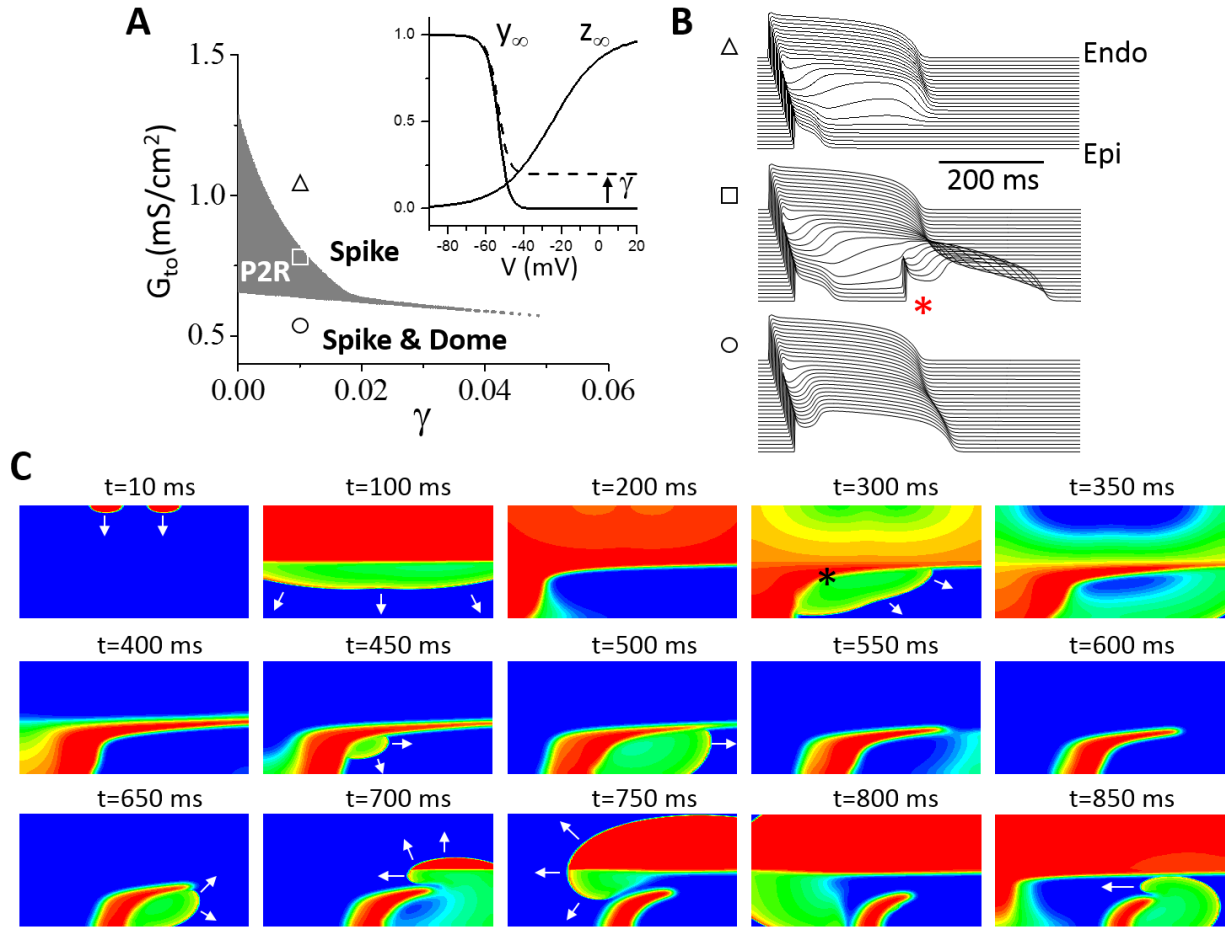

**Figure V. Effects of late  $I_{to}$  on P2R in tissue using the ten Tusscher et al human ventricular AP model. A.** P2R region versus  $G_{to}$  and  $\gamma$ .  $\gamma$  (Eq.4) controls the level of incomplete inactivation of the steady state as indicated in the inset. The simulations were done in the same way as for Fig.2A in the main text. **B.** Time-space plots of voltage from the three parameter locations marked in A. **C.** Wave dynamics in a heterogeneous 2D tissue as for Fig.1C in main text. Shown are voltage snapshots at different time points. Arrows indicate propagating wavefronts. A wave elicited from two stimulus sites ( $t=10$  ms) propagated from the endocardium to epicardium ( $t=100$  ms). Due to the early repolarization in the lower-right quadrant, P2R occurs ( $t=300$  ms, marked by \*), propagates toward the tissue boundary and disappears ( $t=350$  ms and 400 ms). The repolarization pattern remains heterogeneous ( $t=400$  ms) and a new P2R occurs ( $t=450$  ms). Additional new P2Rs occur at  $t=650$  and 850 ms. Tissue size is 7.68 cm x 1.92 cm. See Supplemental Movie II for detailed wave dynamics.

$$G_{Ks}(x, y) = \begin{cases} 0.5G_{Ks} & y \leq L/2 \\ G_{Ks} & y > L/2 \end{cases} \text{ with the control } G_{Ks}=0.245 \text{ mS/cm}^2,$$

$$\text{and } G_{to}(x, y) = \begin{cases} 0, & y \leq L/2. \\ 0.5 + \frac{2}{L}\left(x - \frac{L}{2}\right), & y > L/2. \end{cases} \quad L=512 \text{ cells.}$$

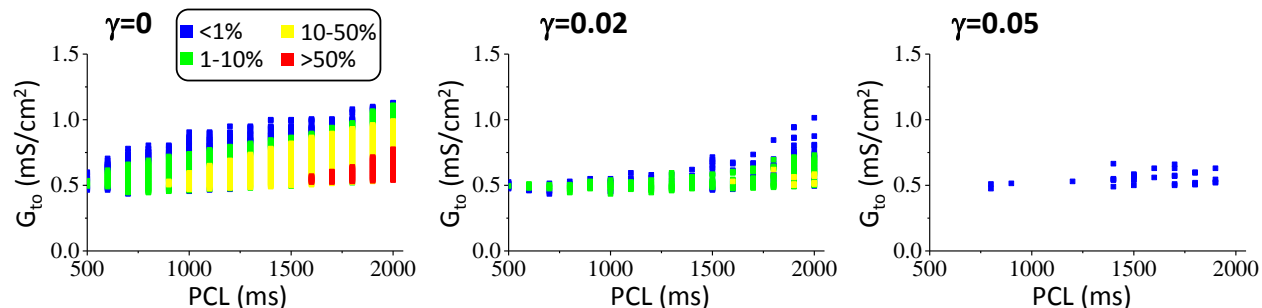

**Figure VI. Dependence of P2R on heart rate and late  $I_{to}$  for the ten Tusscher et al human AP model.** 1D cable simulations with periodic pacing the same as for Fig.3A. Percentage of beats exhibiting PVCs versus in  $G_{to}$  and PCL for  $\gamma = 0$ ,  $\gamma = 0.02$ , and  $\gamma = 0.05$ . 200 pacing beats were applied for each combination of  $G_{to}$  and PCL. Color scale indicates the percentage of PVC beats.

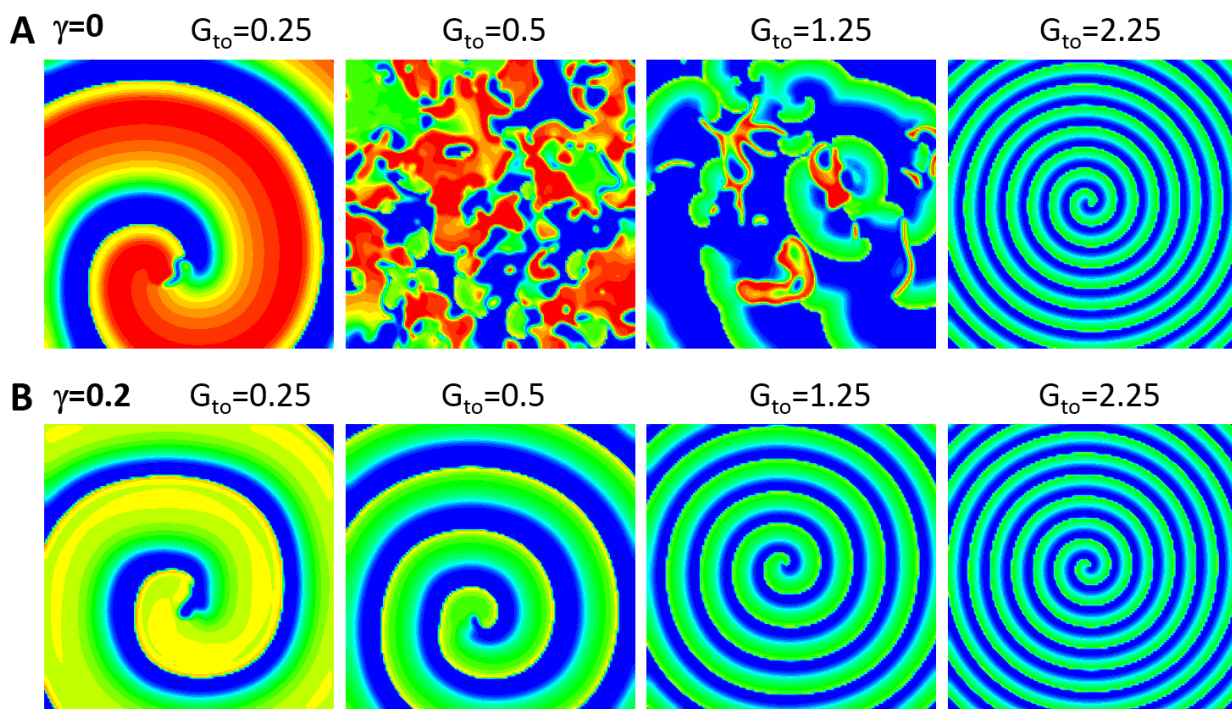

**Figure VII. Effects of late  $I_{to}$  on reentry stability in 2D homogeneous tissue with the ten Tusscher et al human AP model.** Simulations were done in the same way as for Fig.4. **A.** Voltage snapshots for different  $G_{to}$  (in unit  $mS/cm^2$ ) for  $\gamma = 0$ . Supplemental Movies III and IV show the wave dynamics for  $G_{to}=0.5$  and  $G_{to}=1.25$   $mS/cm^2$ , respectively. **B.** Same as A but for  $\gamma = 0.2$ .

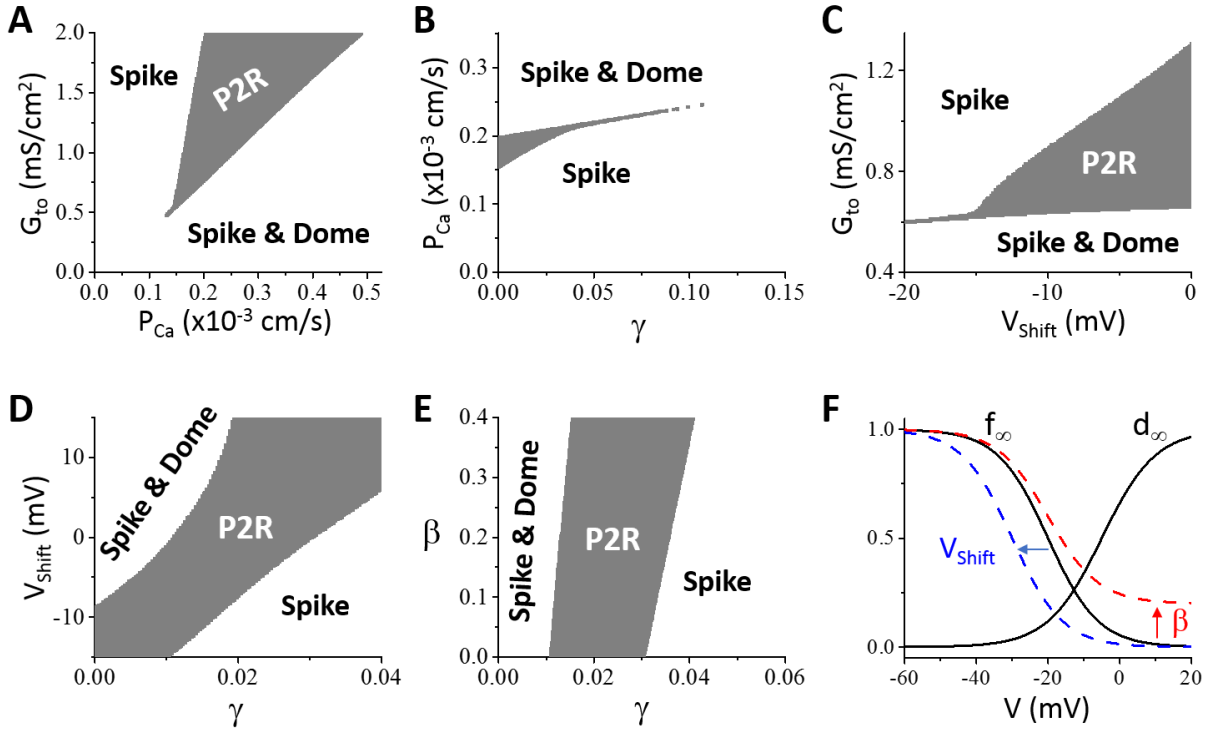

**Figure VIII. Effects of  $I_{Ca,L}$  on P2R in 1D cable using the ten Tusscher et al human AP model.** The cable model is the same as for Fig.6 in main text except the action potential model. **A.** P2R region versus  $P_{Ca}$  and  $G_{to}$  for  $\gamma = 0$ .  $P_{Ca}$  is a parameter proportional to the maximum conductance of  $I_{Ca,L}$ . **B.** P2R region versus  $\gamma$  and  $P_{Ca}$  for  $G_{to}=0.75$  mS/cm<sup>2</sup>. **C.** Effects of window  $I_{Ca,L}$  on P2R, simulated by shifting  $f_\infty$  as indicated in panel F. Shown is the P2R region versus  $V_{shift}$  and  $G_{to}$ . **D.** P2R region versus  $\gamma$  and  $V_{shift}$ .  $P_{Ca}=0.00020125$  cm/s and  $G_{to}=0.75$  mS/cm<sup>2</sup>. **E.** P2R region versus  $\gamma$  and  $\beta$ .  $\beta$  is the parameter controlling the late component of  $I_{Ca,L}$  by changing the steady-state inactivation ( $f_\infty$ ) as:  $f_{\infty,new} = \beta + (1 - \beta)f_\infty$  (as indicated in panel F).  $P_{Ca}=0.00020125$  cm/s and  $G_{to}=0.75$  mS/cm<sup>2</sup>. **F.** Changes of  $f_\infty$ . Solid black curve is the original  $f_\infty$ . Dashed red curve is the one after the late component elevated. Dashed blue curve is the one after a left shift.  $V_{shift}>0$  for the right shift and  $V_{shift}<0$  for the left shift. The results shown in A-E are almost the same as those for the 1994 Luo and Rudy AP model shown in Fig.6 in the main text and in Fig.S4.

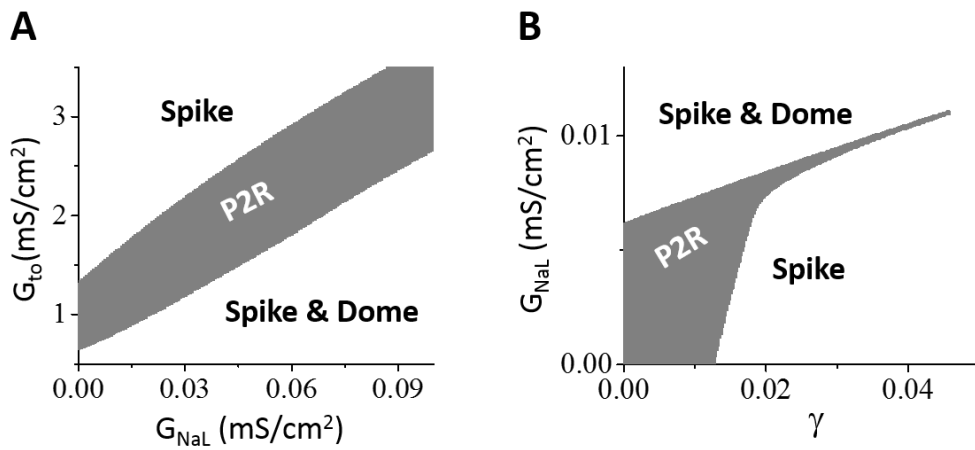

**Figure IX. Effects of late  $I_{Na}$  on P2R in the 1D cable using the ten Tusscher et al human AP model.** The cable model is the same as for Fig.7 in main text except the action potential model. **A.** P2R region versus  $G_{NaL}$  and  $G_{to}$ . **B.** P2R region versus  $\gamma$  and  $G_{NaL}$ .  $G_{to}=0.75$  mS/cm<sup>2</sup>. These results are the same as those for the 1994 Luo and Rudy model shown in Figs. 7 C and D in the main text.



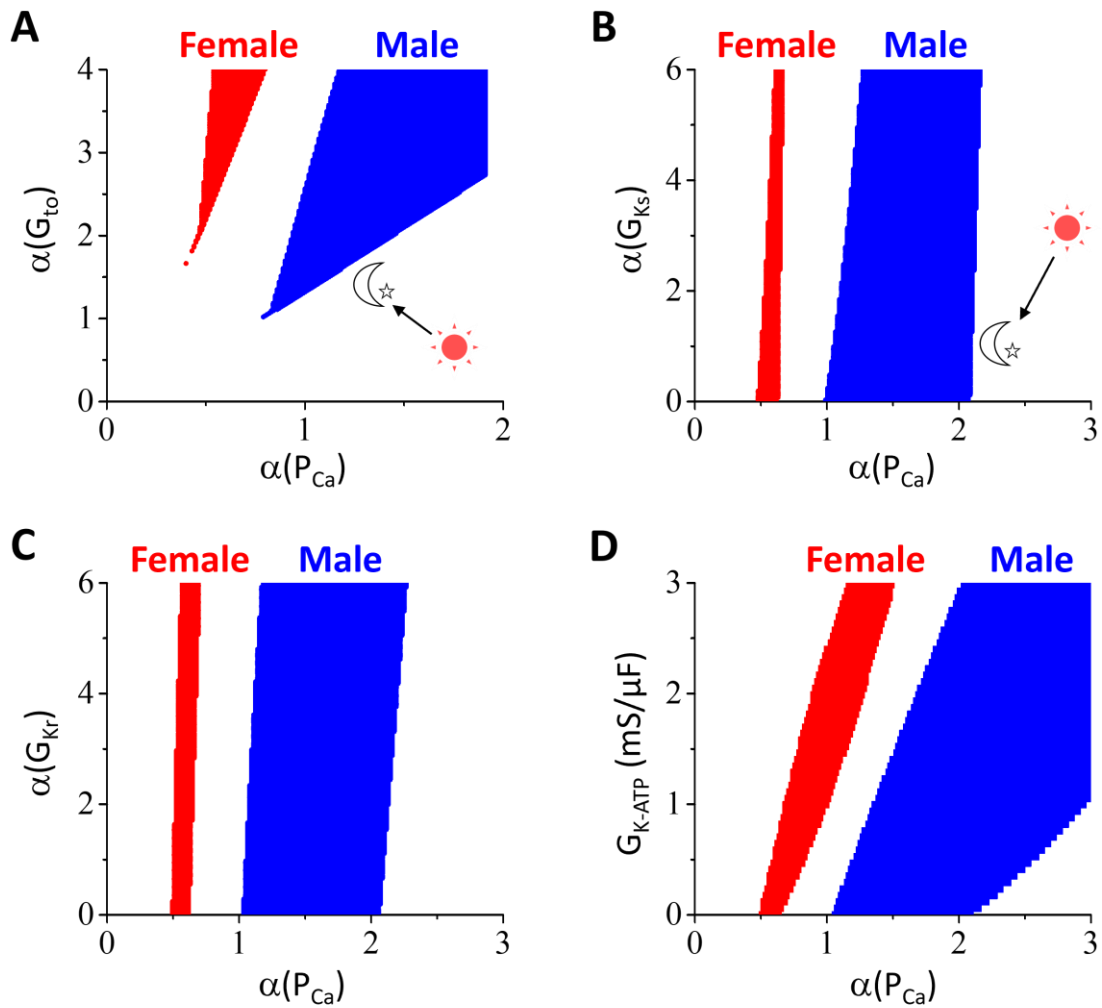

**Figure X. Effects of sex difference and circadian rhythm on P2R using the ten Tusscher et al human AP model.** Simulations were done in a 1D cable the same way as for Fig.8 in the main text but with the ten Tusscher et al human AP model. **A.** P2R regions for male and female versus  $\alpha(P_{Ca})$  and  $\alpha(G_{t0})$ . **B.** P2R regions for male and female versus  $\alpha(P_{Ca})$  and  $\alpha(G_{Ks})$ . **C.** P2R regions for male and female versus  $\alpha(P_{Ca})$  and  $\alpha(G_{Kr})$ . **D.** P2R regions for male and female versus  $\alpha(P_{Ca})$  and  $G_{K-ATP}$ .  $\alpha(G_{t0})=3$  was used for B-D.

## Supplemental Movies

**Movie I.** Wave dynamics showing the genesis of P2R in 2D tissue with the 1994 Luo and Rudy model, corresponding to Fig.1C.

**Movie II.** Wave dynamics showing the genesis of P2R in 2D tissue with the 2004 ten Tusscher et al human model, corresponding to Supplemental Fig.VC.

**Movie III.** Wave dynamics in 2D homogeneous tissue with the 2004 ten Tusscher et al human model, corresponding to the  $G_{t0}=0.5$  mS/cm<sup>2</sup> case in Supplemental Fig.VIIA.

**Movie IV.** Wave dynamics in 2D homogeneous tissue with the 2004 ten Tusscher et al human model, corresponding to the  $G_{t0}=1.25$  mS/cm<sup>2</sup> case in Supplemental Fig.VIIA.
